# Supplementary material
Source: PubMed Central journal article supplement (PMC2996636)
Supplement: 1015496107_pnas.201015496SI.pdf [file 1015496107_pnas.201015496SI.pdf]

# Supporting Information

Telleria et al. 10.1073/pnas.1015496107

Table S1. Origin and characteristics of the 28 stocks under study

| No. | Taxon                       | Stock              | DTU    | Locality                  | Host/vector                     |
|-----|-----------------------------|--------------------|--------|---------------------------|---------------------------------|
| 1   | <i>T. cruzi</i>             | CUICA cl1          | Tc I   | Sao Paulo, Brazil         | <i>Opossum cuica philander</i>  |
| 2   | <i>T. cruzi</i>             | CUTIA cl1          | Tc I   | Espiritu Santo, Brazil    | <i>Dasyprocta aguti</i>         |
| 3   | <i>T. cruzi</i>             | Esquilo cl1        | Tc I   | Sao Paulo, Brazil         | <i>Sciurus aestuans ingrami</i> |
| 4   | <i>T. cruzi</i>             | P209 cl1           | Tc I   | Sucre, Bolivia            | Human                           |
| 5   | <i>T. cruzi</i>             | SO34 cl4           | Tc I   | Potosi, Bolivia           | <i>Triatoma infestans</i>       |
| 6   | <i>T. cruzi</i>             | SP104 cl1          | Tc I   | Region IV, Chile          | <i>Triatoma spinolai</i>        |
| 7   | <i>T. cruzi</i>             | 10 R26             | Tc IV  | Santa Cruz, Bolivia       | <i>Aotus sp.</i>                |
| 8   | <i>T. cruzi</i>             | 92122102R          | Tc IV  | Georgia, USA              | <i>Procyon lotor (M)</i>        |
| 9   | <i>T. cruzi</i>             | CAN III cl1 Z3 cl2 | Tc IV  | Belen, Brazil             | Human                           |
| 10  | <i>T. cruzi</i>             | Dog theis          | Tc IV  | United States             | Dog                             |
| 11  | <i>T. cruzi</i>             | CBB cl3            | Tc II  | Region IV, Chile          | Human                           |
| 12  | <i>T. cruzi</i>             | IVV cl4            | Tc II  | Region IV, Chile          | Human                           |
| 13  | <i>T. cruzi</i>             | MAS1 cl1           | Tc II  | Brasilia, Brazil          | Human                           |
| 14  | <i>T. cruzi</i>             | TU18 cl93          | Tc II  | Tupiza, Bolivia           | <i>T. infestans</i>             |
| 15  | <i>T. cruzi</i>             | CM 17              | Tc III | Meta, Colombia            | <i>Dasypus sp.</i>              |
| 16  | <i>T. cruzi</i>             | X109/2             | Tc III | Makthawaiya, Paraguay     | Dog                             |
| 17  | <i>T. cruzi</i>             | M5631 cl5          | Tc III | Selva Terra, Brazil       | <i>Dasypus novemcinctus</i>     |
| 18  | <i>T. cruzi</i>             | M6241 cl6          | Tc III | Belen, Brazil             | Human                           |
| 19  | <i>T. cruzi</i>             | MN cl2             | Tc V   | Region IV, Chile          | Human                           |
| 20  | <i>T. cruzi</i>             | NR cl3             | Tc V   | Region III, Chile         | Human                           |
| 21  | <i>T. cruzi</i>             | Bug 2148 cl1       | Tc V   | Rio Grande do Sul, Brazil | <i>T. infestans</i>             |
| 22  | <i>T. cruzi</i>             | SC43 cl1           | Tc V   | Santa Cruz, Bolivia       | <i>T. infestans</i>             |
| 23  | <i>T. cruzi</i>             | Tulahuen 1954      | Tc VI  | Region IV, Chile          | <i>T. infestans</i>             |
| 24  | <i>T. cruzi</i>             | CL Brener          | Tc VI  | Rio Grande do Sul, Brazil | <i>T. infestans</i>             |
| 25  | <i>T. cruzi</i>             | Y7                 | Tc VI  | Sao Paulo, Brazil         | <i>T. infestans</i>             |
| 26  | <i>T. cruzi</i>             | P63 cl1            | Tc VI  | Makthawaiya, Paraguay     | <i>T. infestans</i>             |
| 27  | <i>T. cruzi marinkellei</i> | B7 cl11            | –      | Bahia, Brazil             | <i>Phyllostomus discolor</i>    |
| 28  | <i>T. cruzi marinkellei</i> | M1909              | –      | Caracas, Venezuela        | <i>P. discolor</i>              |
